# Supplementary material for: Efficient heterologous expression of an alkaline lipase and its application in hydrolytic production of free astaxanthin
Source: PubMed Central journal article supplement (PMC6020301; doi:10.1186/s13068-018-1180-2), 2018-06-27
Supplement: 13068_2018_1180_MOESM1_ESM.pdf [file 13068_2018_1180_MOESM1_ESM.pdf]

**A**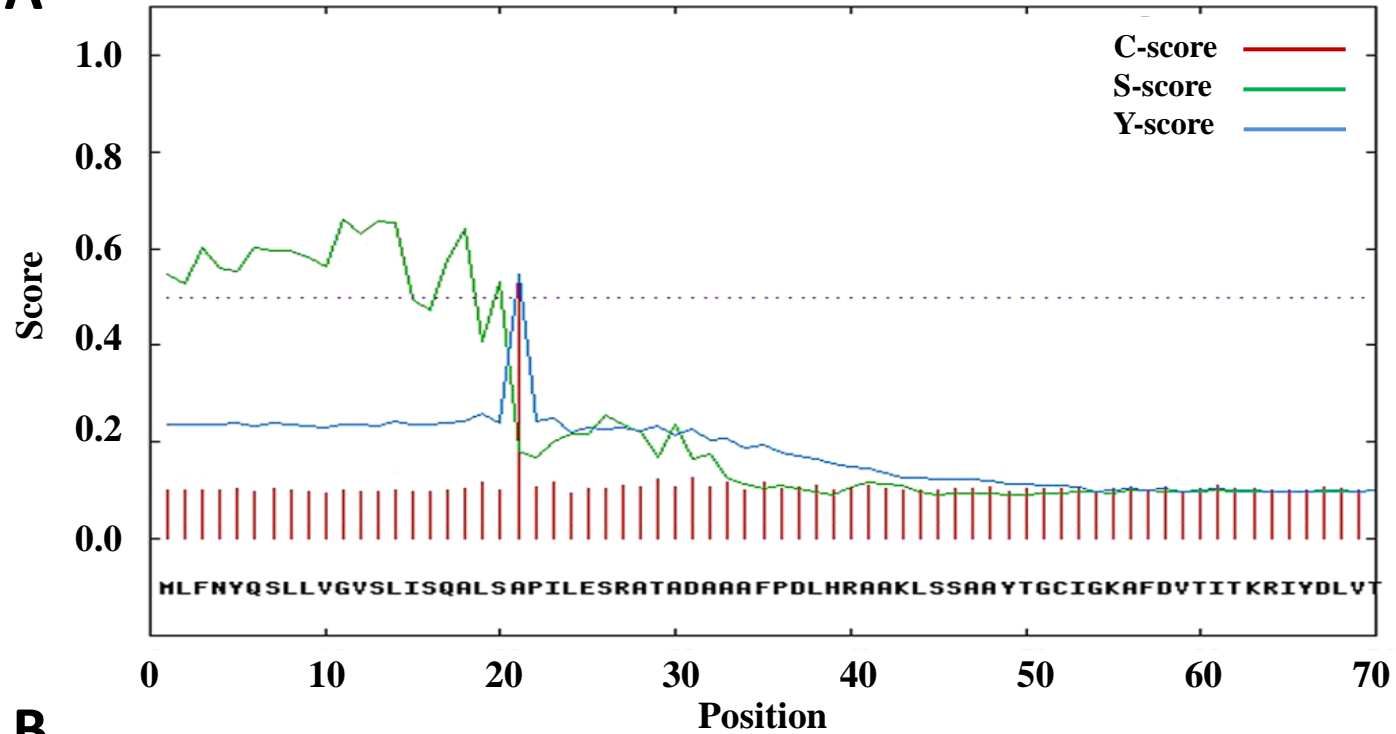**B**

1 MLFNYQSLLV GVSLISQALS **APILES**RATA DAAFPDLHR AAKLSSAAYT GCIGKAFDVT

61 ITKRIYDLVT DTNGFVGYST EKKTIAVIMR GSTTITDFVN DIDIALITPE LSGVTFPSDV

121 KIMRGVHRPW SAVHDTIITE VKALIAKYPD YTLEAVGHSL GGALTSIAHV ALAQNFDPKS

181 LVSNALNAFP IGNQAWADFG TAQAGTFNRG NNVLDGVPNM YSSPLVNFKH YGTEYYSSGT

241 EASTVKCEGQ RDKSCSAGNG MYAVTPGHIA SFGVVMLTAG CGYLS

■ signal peptides      ■ propeptide      ■ mature lipase
