# Supplementary material for: Efficient heterologous expression of an alkaline lipase and its application in hydrolytic production of free astaxanthin
Source: PubMed Central journal article supplement (PMC6020301; doi:10.1186/s13068-018-1180-2), 2018-06-27

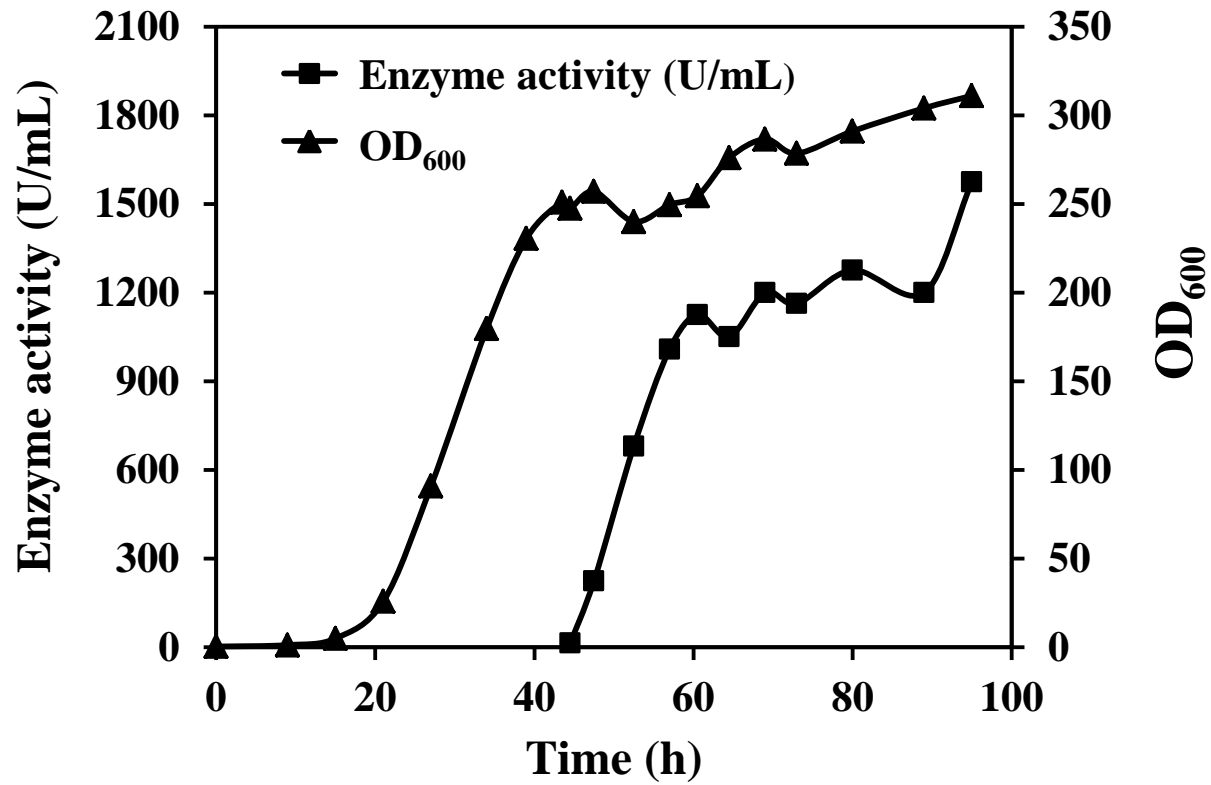

Supplement: 13068_2018_1180_MOESM3_ESM.pdf [file 13068_2018_1180_MOESM3_ESM.pdf]
